# Supplementary material for: Biosilica structures with controllable morphology produced by an electrochemical process on indium tin oxide surfaces
Source: Royal Society of Chemistry journal article supplement (doi:10.1039/c2ra21326e), 2012-01-01
Supplement: c2ra21326e.pdf [file c2ra21326e.pdf]

## Supporting Information

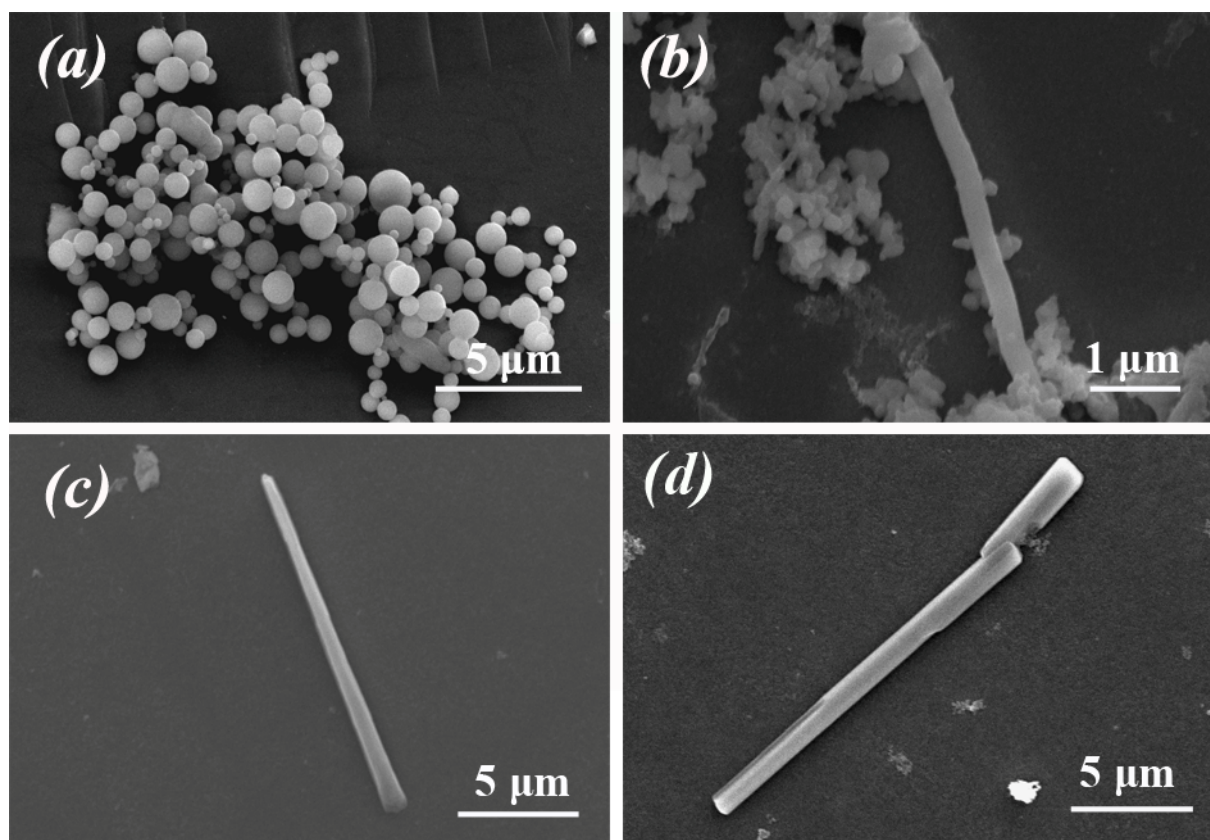

**Fig. S1** SEM images of biosilica synthesized by changing electric potential: (a) 1 V, (b) 2 V, (c) 4 V, and (d) 6 V, respectively. The PLL<sub>1</sub> peptide concentration was 6 mg/ml.

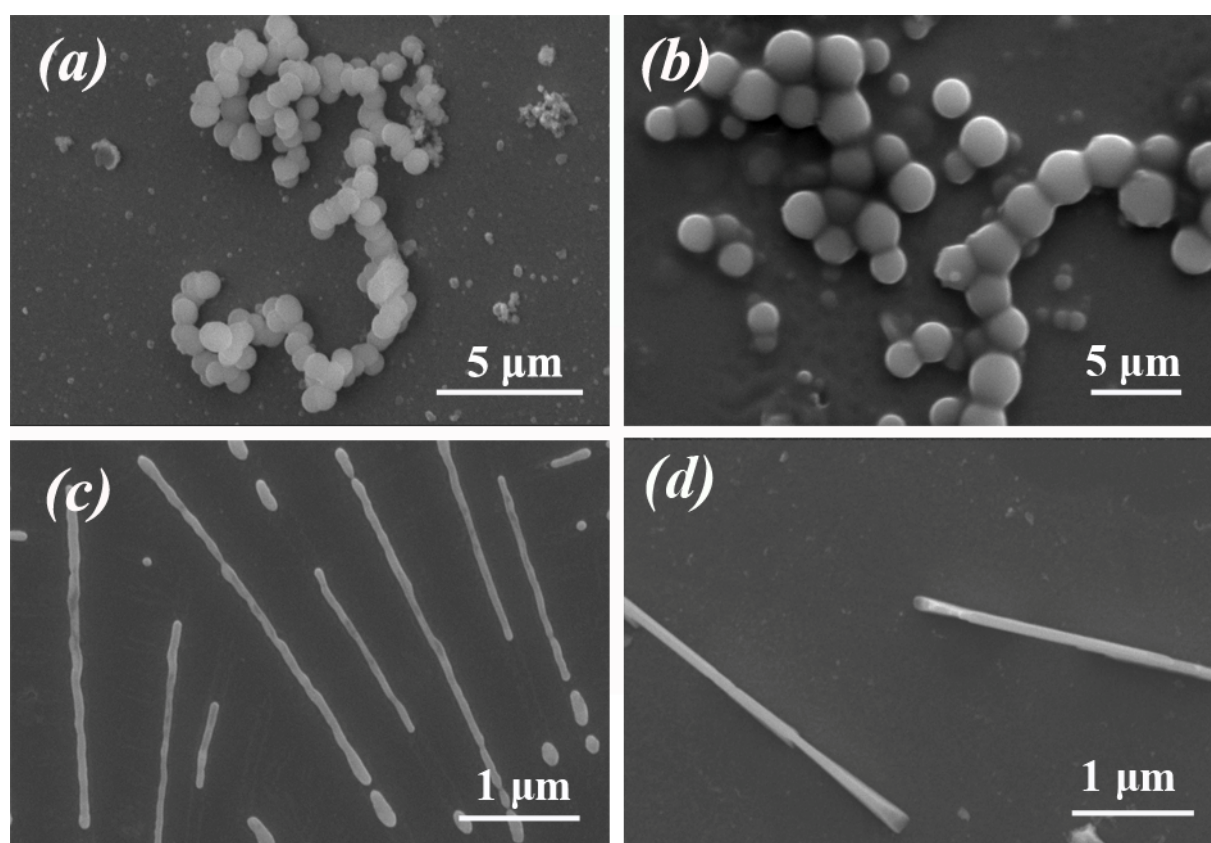

**Fig. S2** SEM images of biosilica synthesized by adjusting the PLL<sub>1</sub> peptide concentration: (a) 1 mg/ml, (b) 3 mg/ml, (c) 6 mg/ml, and (d) 9 mg/ml, respectively. Experiments performed in the presence of an externally applied electric field (4 V).

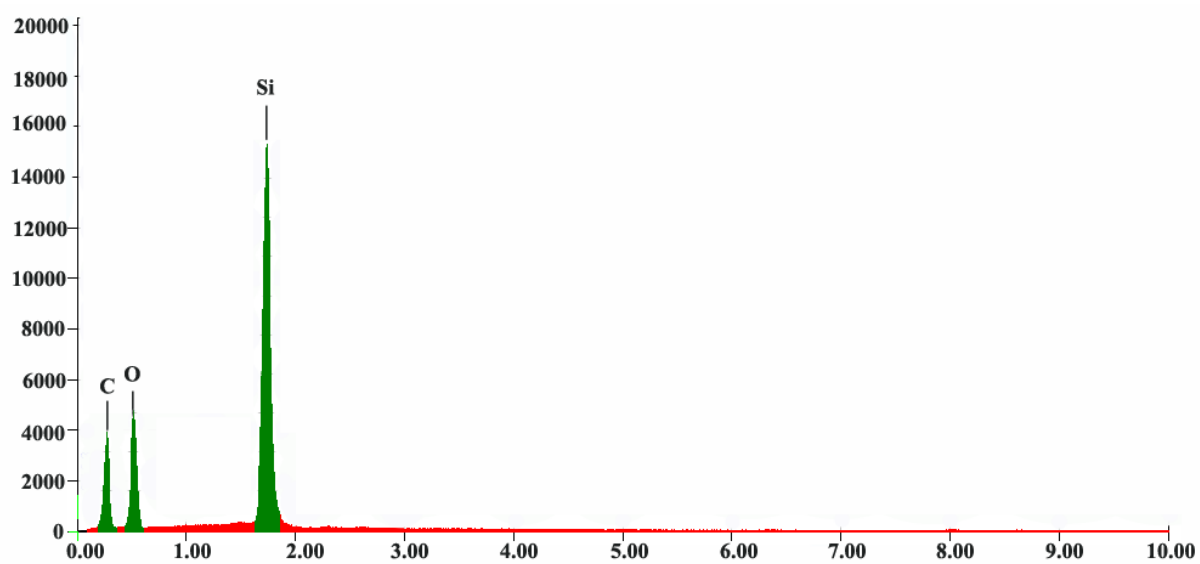

**Fig. S3** Energy-dispersive spectra (EDS) of peptide-silica hybrid particles.

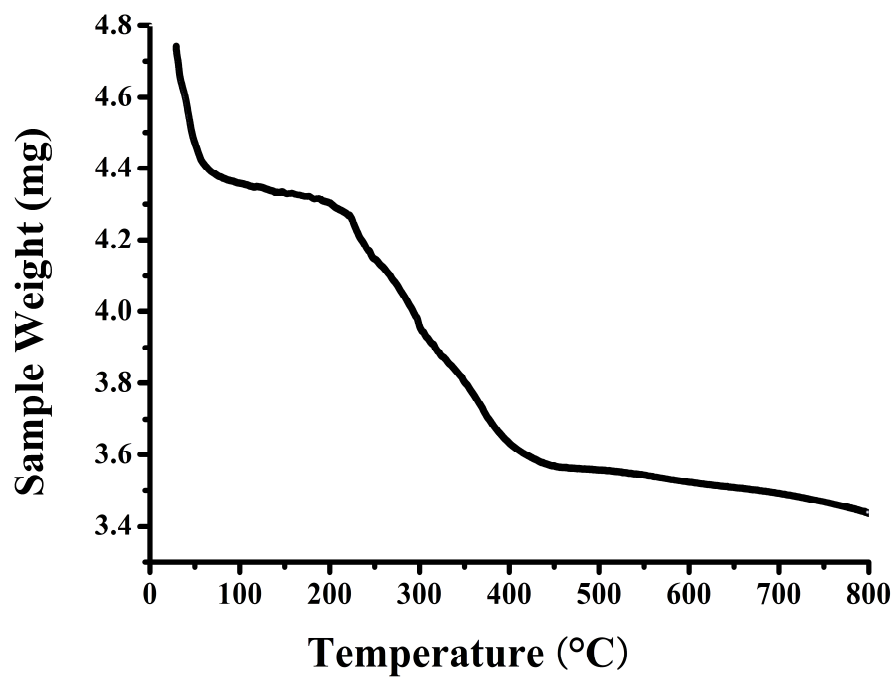

**Fig. S4** Thermogravimetric analysis (TGA) spectrum of peptide-silica composites.
